# Supplementary material for: MRTX1719 Is an MTA-Cooperative PRMT5 Inhibitor That Exhibits Synthetic Lethality in Preclinical Models and Patients with MTAP-Deleted Cancer
Source: PubMed Central journal article supplement — Cancer Discov. 2023 Aug 8;13(11):2412–31. doi: 10.1158/2159-8290.CD-23-0669 (PMC10618744; doi:10.1158/2159-8290.cd-23-0669), 2023-08-08
Supplement: cd-23-0669_supplementary_figure_s1_suppsf1.pdf [file cd-23-0669_supplementary_figure_s1_suppsf1.pdf]

**Figure S1**

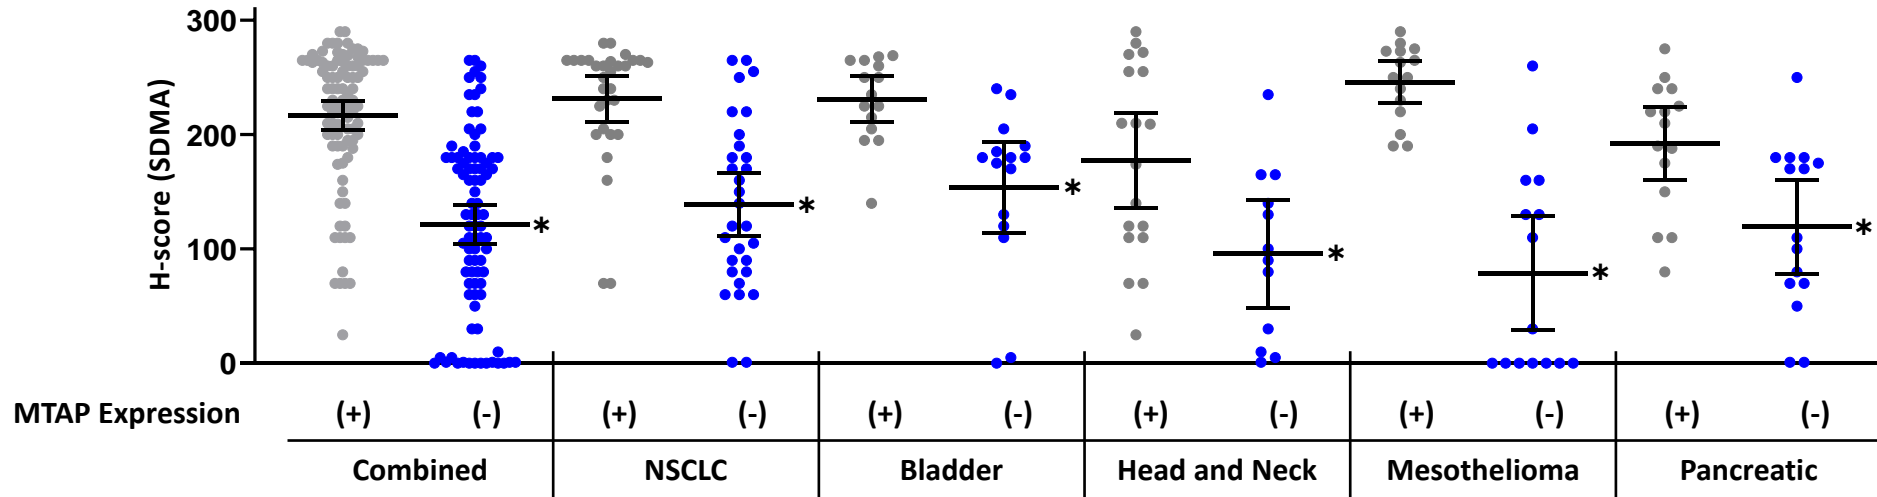

Figure S1. Neoplastic SDMA protein expression levels by immunohistochemistry H-scoring in neoplastic MTAP expressing and neoplastic MTAP non-expressing tumors in tissue microarrays (TMAs) across several cancer types known to have a high percentage of *MTAP* del. Cores from TMAs with no MTAP protein expression in neoplastic cells were identified and compared to a similar number of cores with MTAP protein expression in neoplastic cells and analyzed for neoplastic SDMA H-scores. All cases are shown on the left of the plot and indication-specific analyses are broken out to the right. NSCLC consists of lung adenocarcinoma and lung squamous cell carcinoma cases. Summary statistics shown as mean +/- 95% confidence interval. Statistics were determined using a two-tailed Student's t-test with significance indicated (\*,  $p < 0.05$ ).
