# Supplementary material for: MRTX1719 Is an MTA-Cooperative PRMT5 Inhibitor That Exhibits Synthetic Lethality in Preclinical Models and Patients with MTAP-Deleted Cancer
Source: PubMed Central journal article supplement — Cancer Discov. 2023 Aug 8;13(11):2412–31. doi: 10.1158/2159-8290.CD-23-0669 (PMC10618744; doi:10.1158/2159-8290.cd-23-0669), 2023-08-08
Supplement: cd-23-0669_supplementary_figure_s2_suppsf2.pdf [file cd-23-0669_supplementary_figure_s2_suppsf2.pdf]

# Figure S2

**A**

| Compound   | IC <sub>50</sub> (nM) |         |      |
|------------|-----------------------|---------|------|
|            | [peptide substrate]   |         |      |
|            | 0.05 μM               | 0.25 μM | 1 μM |
| MRTX1719   | 3                     | 9.6     | 120  |
| GSK3326595 | 18                    | 41      | 150  |

**B**

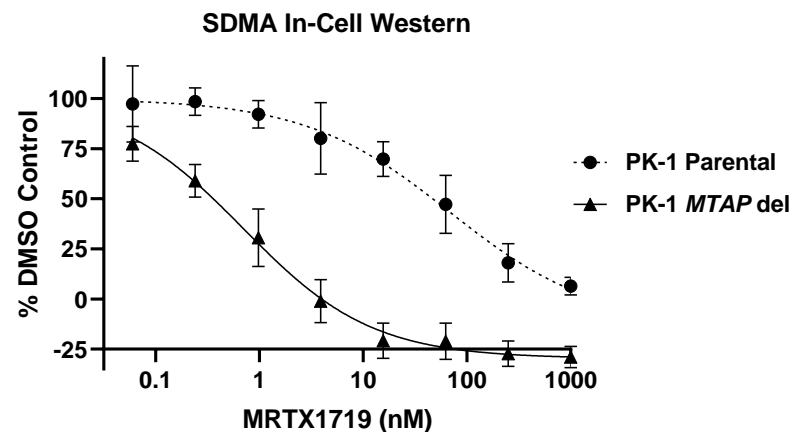

**C**

| Compound     | Absolute IC <sub>50</sub> (nM) |                         |
|--------------|--------------------------------|-------------------------|
|              | 10-Day Viability               |                         |
|              | PK-1 ( <i>MTAP</i> WT)         | PK-1 ( <i>MTAP</i> del) |
| MRTX1719     | 818                            | 7.1                     |
| GSK3326595   | 52                             | 24                      |
| JNJ-64619178 | 1.1                            | 0.7                     |

**D**

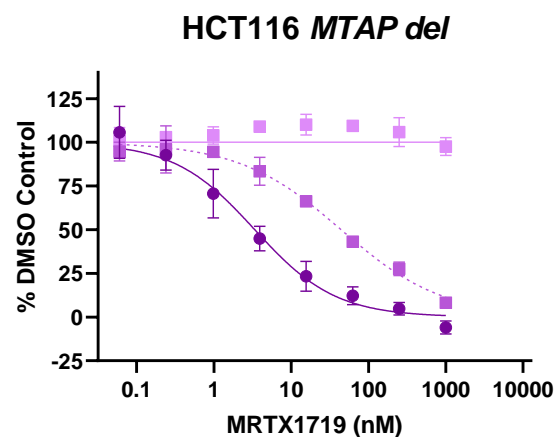

**E**

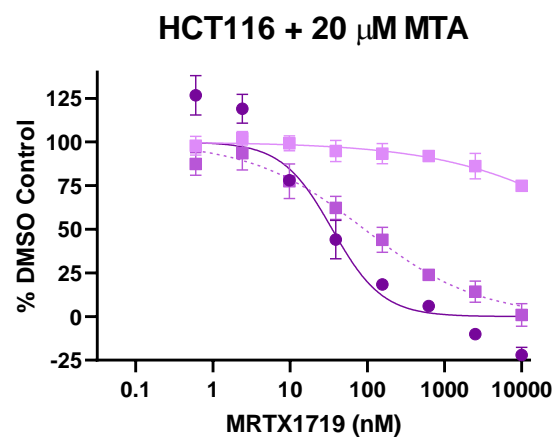

**F**

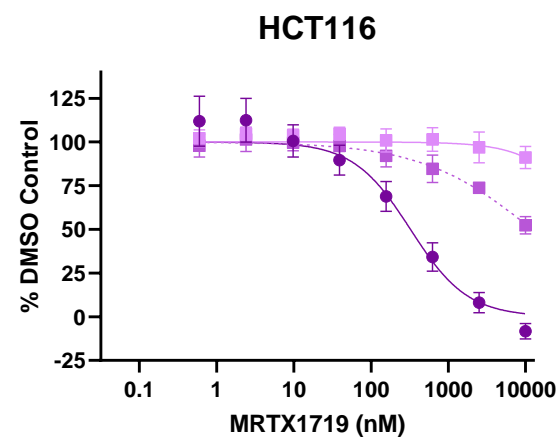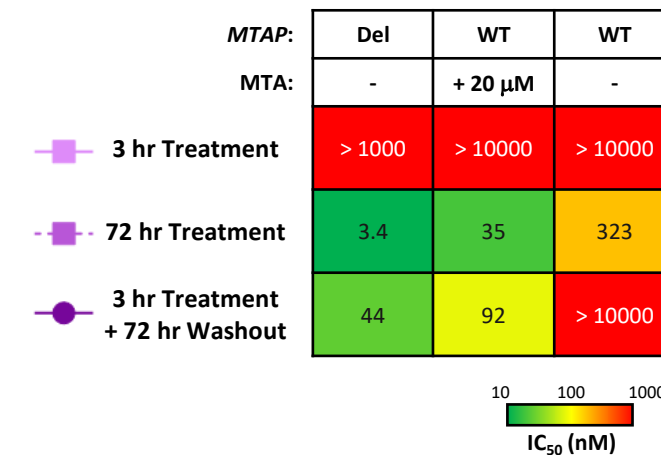

Figure S2. A. Half-maximal inhibitory concentration (IC<sub>50</sub>) values of MRTX1719 and GSK3326595 in a PRMT5 biochemical assay tested with different peptide substrate concentrations. Assay runs tested with MRTX1719 included 250 nM MTA. B. MRTX1719 was run in an SDMA In-Cell Western assay (SYM11 antibody) in parental PK-1 cells (*MTAP* WT) and PK-1 cells CRISPR engineered to not express *MTAP* (*MTAP* del). C. MRTX1719, GSK3326595 and JNJ-64619178 were run in 10-Day viability assays in *MTAP* del and WT PK-1 cell lines. D. MRTX1719 washout experiment in *MTAP* del HCT116 cells showing reduction of SDMA following treatment for 3 hrs, 72 hrs or for 3 hrs followed by a 72 hr washout. E. Same experiment as in D except *MTAP* WT HCT116 parental cells cultured with 20 μM MTA were used. F. Same experiment as in D except *MTAP* WT HCT116 parental cells were used.
