# Supplementary material for: MRTX1719 Is an MTA-Cooperative PRMT5 Inhibitor That Exhibits Synthetic Lethality in Preclinical Models and Patients with MTAP-Deleted Cancer
Source: PubMed Central journal article supplement — Cancer Discov. 2023 Aug 8;13(11):2412–31. doi: 10.1158/2159-8290.CD-23-0669 (PMC10618744; doi:10.1158/2159-8290.cd-23-0669), 2023-08-08
Supplement: cd-23-0669_supplementary_figure_s3_suppsf3.pdf [file cd-23-0669_supplementary_figure_s3_suppsf3.pdf]

**Figure S3**

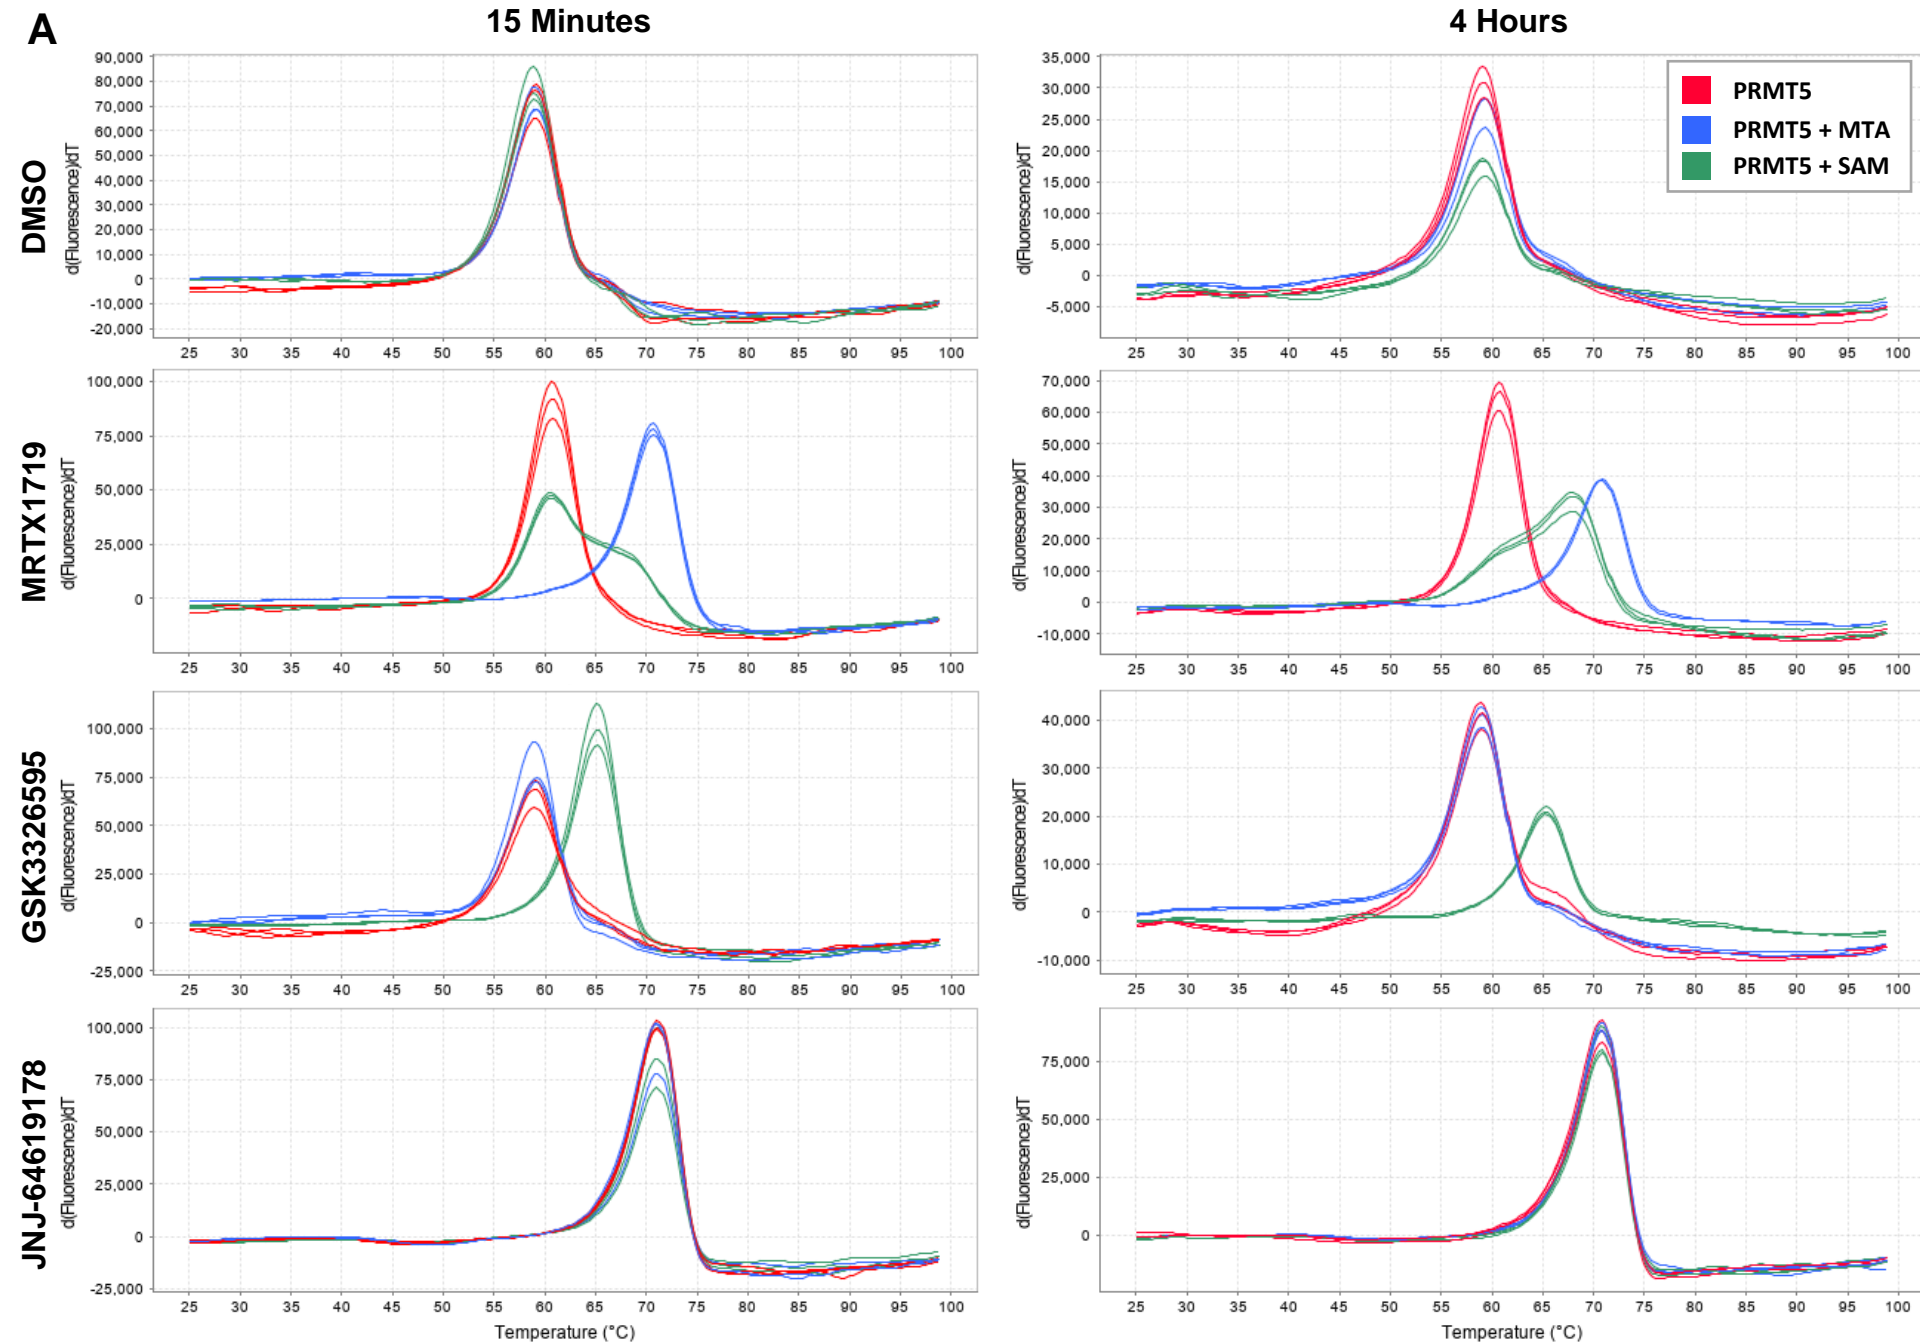

**B**

**$\Delta$  TmD (C)**

|                   | <b>Timepoint (hr)</b> |          |
|-------------------|-----------------------|----------|
|                   | <b>0.25</b>           | <b>4</b> |
| <b>PRMT5 (+):</b> |                       |          |
| DMSO              | 0                     | 0        |
| DMSO + MTA        | 0                     | 0        |
| DMSO + SAM        | 0                     | 0        |
| MRTX1719          | 1.7                   | 1.5      |
| MRTX1719 + MTA    | 11.6                  | 11.6     |
| MRTX1719 + SAM    | 1.5                   | 8.7      |
| GSK-595           | 0                     | 0        |
| GSK-595 + MTA     | 0                     | 0        |
| GSK-595 + SAM     | 6                     | 6.1      |
| JNJ-9178          | 12                    | 11.6     |
| JNJ-9178 + MTA    | 12                    | 11.7     |
| JNJ-9178 + SAM    | 12                    | 11.7     |

Figure S3. A. Thermal melt curves of apo-PRMT5, MTA-bound PRMT5 or SAM-bound PRMT5 in the presence of DMSO, 10  $\mu$ M MRTX1719, 10  $\mu$ M JNJ-64619178, or 10  $\mu$ M GSK3326595 incubated for 15 minutes or 4 hours. B. Table summarizing the melting temperature derivative change ( $\Delta$  TmD) between DMSO control and indicated PRMT5 inhibitor conditions at each timepoint.
