# Supplementary material for: MRTX1719 Is an MTA-Cooperative PRMT5 Inhibitor That Exhibits Synthetic Lethality in Preclinical Models and Patients with MTAP-Deleted Cancer
Source: PubMed Central journal article supplement — Cancer Discov. 2023 Aug 8;13(11):2412–31. doi: 10.1158/2159-8290.CD-23-0669 (PMC10618744; doi:10.1158/2159-8290.cd-23-0669), 2023-08-08
Supplement: cd-23-0669_supplementary_figure_s5_suppsf5.pdf [file cd-23-0669_supplementary_figure_s5_suppsf5.pdf]

# Figure S5

**A**

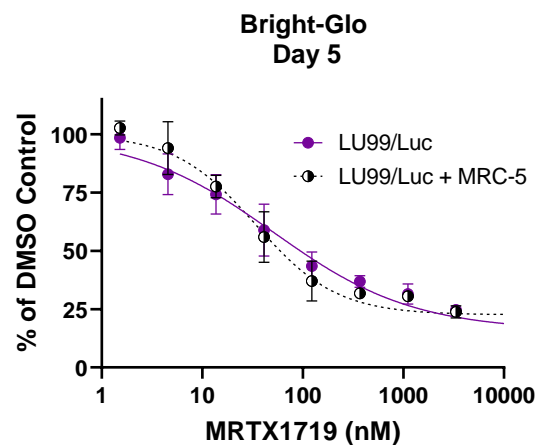

**B**

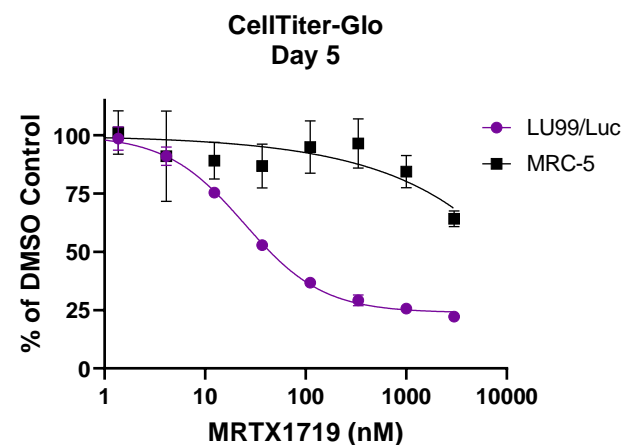

| Bright-Glo |                  | CellTiter-Glo |        |
|------------|------------------|---------------|--------|
| LU99/Luc   | LU99/Luc + MRC-5 | LU99/Luc      | MRC-5  |
| 65         | 80               | 39            | > 3000 |

Average IC50 (nM) (n=2)

Figure S5. A. LU99/Luc cells were cultured alone or co-cultured (1:1) with MRC-5 lung fibroblast cells and treated with DMSO or a dose response of MRTX1719 for 5 days. The relative number of LU99/Luc cells was measured with Bright-Glo and IC50 values were determined for each condition. B. In parallel, LU99/Luc or MRC-5 cells were each cultured alone and treated with DMSO or a dose response of MRTX1719 for 5 days. The relative cell number in each condition was measured with CellTiter-Glo and IC50 values were determined. Graphs shown are representative curves for each condition. The table contains average IC50 values from two independent experiments.
