# Supplementary material for: MRTX1719 Is an MTA-Cooperative PRMT5 Inhibitor That Exhibits Synthetic Lethality in Preclinical Models and Patients with MTAP-Deleted Cancer
Source: PubMed Central journal article supplement — Cancer Discov. 2023 Aug 8;13(11):2412–31. doi: 10.1158/2159-8290.CD-23-0669 (PMC10618744; doi:10.1158/2159-8290.cd-23-0669), 2023-08-08
Supplement: cd-23-0669_supplementary_figure_s6_suppsf6.pdf [file cd-23-0669_supplementary_figure_s6_suppsf6.pdf]

**Figure S6****A**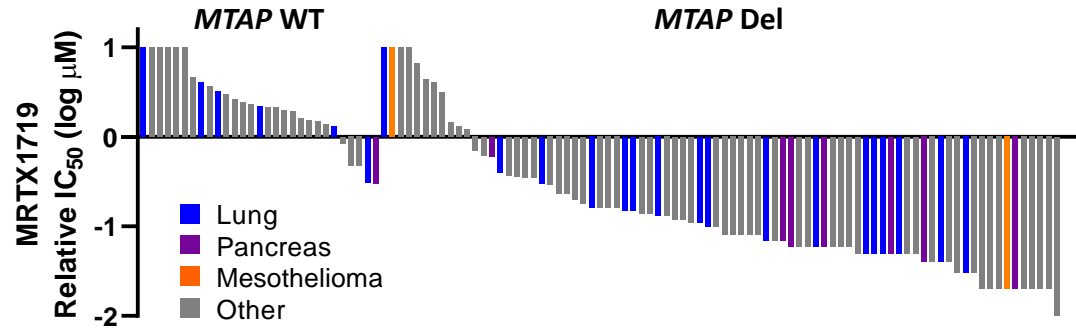**B**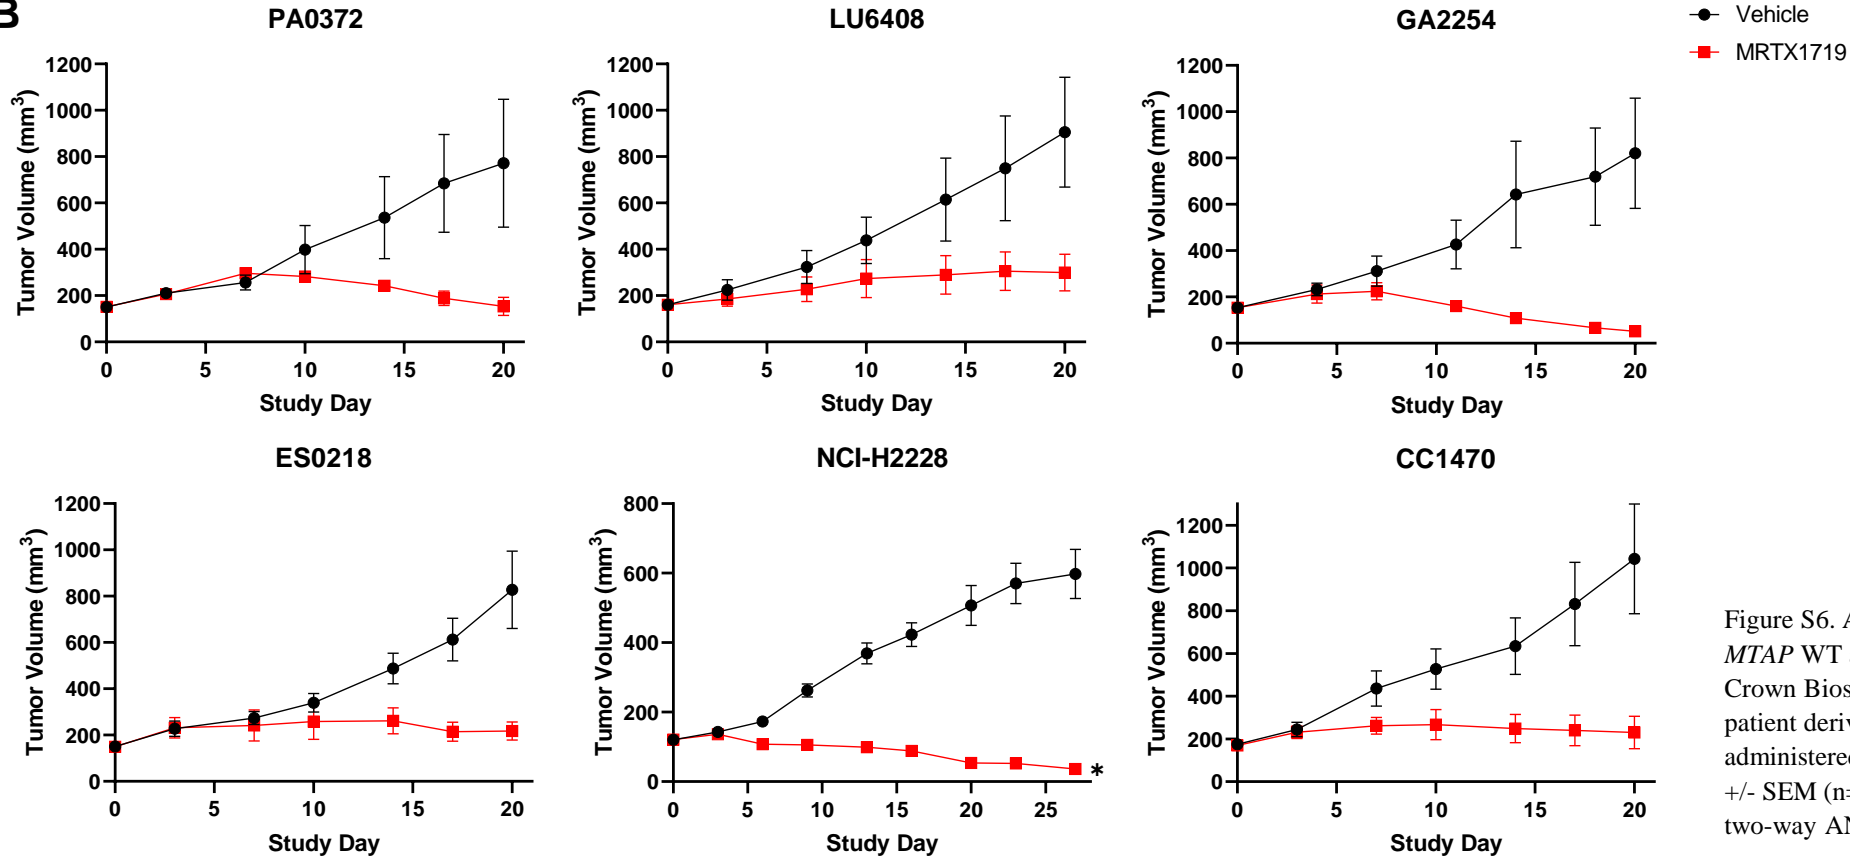

Figure S6. A. MRTX1719 in vitro activity (IC<sub>50</sub>) across a panel of *MTAP* WT and *MTAP* del cell line models (5-day viability assay, Crown Biosciences). B. MRTX1719 was tested in cell line- and patient derived-xenograft tumor models at 50 or 100 mg/kg administered by oral gavage QD. Average tumor volume is plotted +/- SEM (n=3/treatment group). Statistics were determined using a two-way ANOVA with significance indicated (\*, p < 0.05).
