# Supplementary material for: MRTX1719 Is an MTA-Cooperative PRMT5 Inhibitor That Exhibits Synthetic Lethality in Preclinical Models and Patients with MTAP-Deleted Cancer
Source: PubMed Central journal article supplement — Cancer Discov. 2023 Aug 8;13(11):2412–31. doi: 10.1158/2159-8290.CD-23-0669 (PMC10618744; doi:10.1158/2159-8290.cd-23-0669), 2023-08-08
Supplement: cd-23-0669_supplementary_figure_s7_suppsf7.pdf [file cd-23-0669_supplementary_figure_s7_suppsf7.pdf]

# Figure S7

A

| Specimen Information |                                    |         |          |           | Staining of Neoplastic Cells |         |        |                                    |     |    |     |     |     |     |     | Stromal Cells    | Staining of Other Cell Types |            |              |        |     |               |       |
|----------------------|------------------------------------|---------|----------|-----------|------------------------------|---------|--------|------------------------------------|-----|----|-----|-----|-----|-----|-----|------------------|------------------------------|------------|--------------|--------|-----|---------------|-------|
| Subject ID           | Tissue Type                        | Analyte | Clone    | Visit     | Percent Positive             | H-Score | Max SI | % Cells Staining at Each Intensity |     |    |     |     |     |     | NCR | Percent Positive | Endothelial                  | Fibroblast | Inflammatory | Stroma | NAT | Smooth Muscle | Nerve |
|                      |                                    |         |          |           |                              |         |        | 3+                                 | SCL | 2+ | SCL | 1+  | SCL | 0   |     |                  |                              |            |              |        |     |               |       |
| 001-104-002          | Mesothelioma (epithelioid)         | MTAP    | 2G4      | Screening | 0                            | 0       | 0      | 0                                  |     | 0  |     | 0   |     | 100 | 0   | ND               | 2+N                          | 2+N        | 2+N          | 0      | NS  | NS            | NS    |
|                      |                                    |         |          | C2D1      | 0                            | 0       | 0      | 0                                  |     | 0  |     | 100 | 0   | ND  | 2+N | 2+N              | 2+N                          | 0          | NS           | NS     | NS  |               |       |
|                      |                                    | SDMA    | MultiMab | Screening | 100                          | 240     | 3+     | 45                                 | N   | 50 | N   | 5   | N   | 0   | 0   | 100              | 2+N                          | 2+N        | 2+N          | 0      | NS  | NS            | NS    |
|                      |                                    |         |          | C2D1      | 0                            | 0       | 0      | 0                                  |     | 0  |     | 100 | 0   | 90  | 0   | 1+N              | 1+N                          | 0          | NS           | NS     | NS  |               |       |
| 001-103-005          | Non Small Cell Lung Cancer (NSCLC) | MTAP    | 2G4      | Screening | 0                            | 0       | 0      | 0                                  |     | 0  |     | 0   |     | 100 | 0   | ND               | 2+N                          | 2+N        | 2+N          | 0      | NS  | NS            | NS    |
|                      |                                    |         |          | C2D1      | 0                            | 0       | 0      | 0                                  |     | 0  |     | 100 | 0   | ND  | 2+N | 2+N              | 2+N                          | 0          | NS           | NS     | NS  |               |       |
|                      |                                    | SDMA    | MultiMab | Screening | 100                          | 280     | 3+     | 80                                 | N   | 20 | N   | 0   |     | 0   | 0   | 100              | 2+N                          | 2+N        | 3+N          | 0      | NS  | NS            | NS    |
|                      |                                    |         |          | C2D1      | 0                            | 0       | 0      | 0                                  |     | 0  |     | 100 | 0   | 50  | 0   | 2+N              | 2+N                          | 0          | NS           | NS     | NS  |               |       |
| 001-103-004          | Mesothelioma (epithelioid)         | MTAP    | 2G4      | Screening | 0                            | 0       | 0      | 0                                  |     | 0  |     | 0   |     | 100 | 0   | ND               | 2+N                          | 2+N        | 2+N          | 0      | NS  | NS            | NS    |
|                      |                                    |         |          | C2D1      | 0                            | 0       | 0      | 0                                  |     | 0  |     | 100 | 0   | ND  | 2+N | 3+N              | 3+N                          | 0          | NS           | NS     | NS  |               |       |
|                      |                                    | SDMA    | MultiMab | Screening | 100                          | 250     | 3+     | 50                                 | N   | 50 | N   | 0   |     | 0   | 0   | 100              | 1+N                          | 2+N        | 3+N          | 0      | NS  | NS            | NS    |
|                      |                                    |         |          | C2D1      | 0                            | 0       | 0      | 0                                  |     | 0  |     | 100 | 0   | 0   | 0   | 0                | 0                            | 0          | 0            | 0      | NS  | NS            | NS    |

B

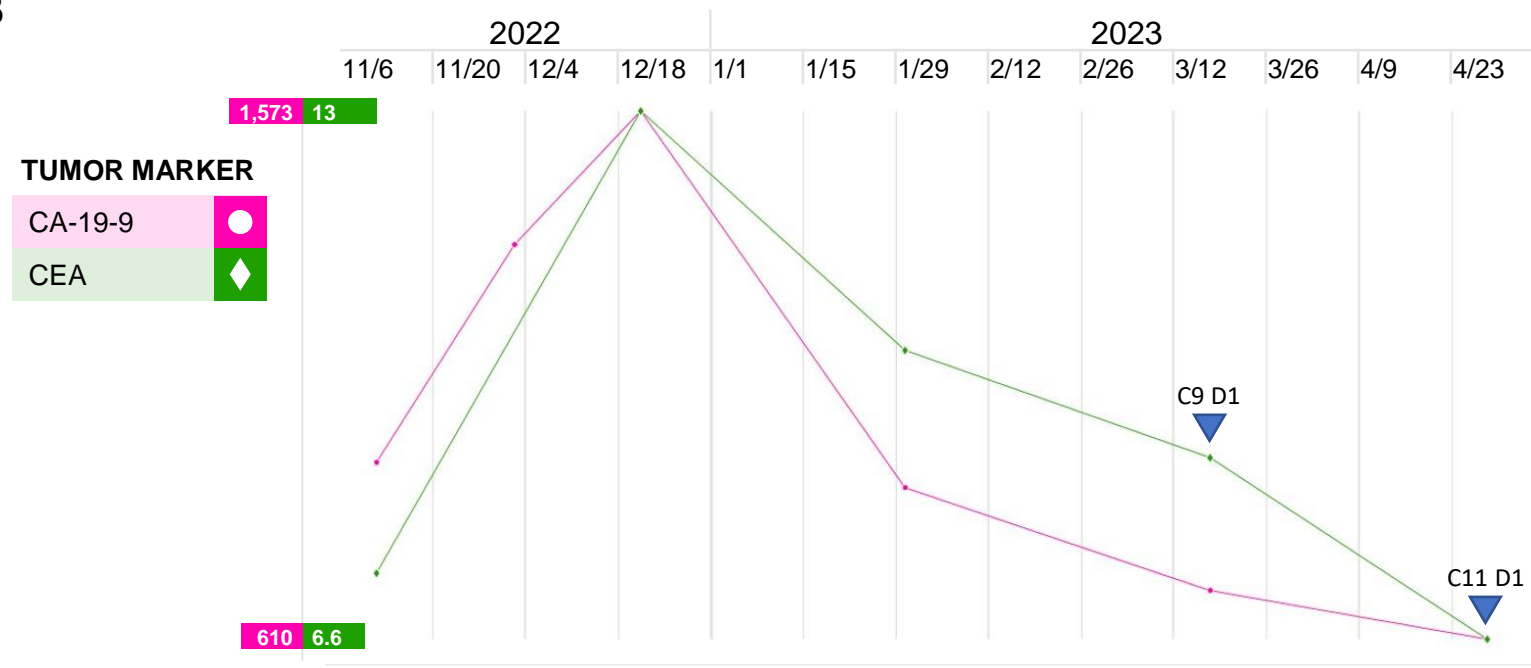

Figure S7. A. Tabular SDMA and MTAP H-score IHC data from pretreatment and on treatment (C2D1) tumor biopsies. Abbreviations: Inflamm, Inflammatory; Max SI, Maximum Staining Intensity; N, Nuclear Staining; NA, Not Applicable; NAT, Normal Adjacent Tissue; NCR, Negative Control Reagent; ND, Not Determined; NS, Not Seen; SCL, Subcellular Localization. B. Circulating surrogate tumor marker CA 19-9 and CEA data from patient 001-105-008 with gallbladder adenocarcinoma.
