# Supplementary material for: MRTX1719 Is an MTA-Cooperative PRMT5 Inhibitor That Exhibits Synthetic Lethality in Preclinical Models and Patients with MTAP-Deleted Cancer
Source: PubMed Central journal article supplement — Cancer Discov. 2023 Aug 8;13(11):2412–31. doi: 10.1158/2159-8290.CD-23-0669 (PMC10618744; doi:10.1158/2159-8290.cd-23-0669), 2023-08-08
Supplement: cd-23-0669_supplementary_table_s1_suppst1.pdf [file cd-23-0669_supplementary_table_s1_suppst1.pdf]

Table S1: Hematological parameters measured following a 28-day repeat dose study with administration of MRTX1719 at 150 mg/kg QD daily to male and female CD-1 mice.

|                                                 | Sex<br>Treatment      | Male (n=10/treatment group) |      |              |      | Female (n=10/treatment group) |      |              |      |      |
|-------------------------------------------------|-----------------------|-----------------------------|------|--------------|------|-------------------------------|------|--------------|------|------|
|                                                 |                       | Vehicle                     |      | 150 mg/kg QD |      | Vehicle                       |      | 150 mg/kg QD |      |      |
|                                                 |                       | Mean                        | SD   | Mean         | SD   | Mean                          | SD   | Mean         | SD   |      |
| <b>Leukocyte Count (WBC)</b>                    | (10 <sup>3</sup> /μL) | 3                           | 1.28 | 3.14         | 1.61 | 2.53                          | 1.35 | 3.55         | 1.65 | [a]  |
| Neutrophils                                     | (10 <sup>3</sup> /μL) | 0.51                        | 0.2  | 0.76         | 0.54 | 0.39                          | 0.15 | 0.57         | 0.19 | [a]  |
|                                                 | (%)                   | 18                          | 4.2  | 25           | 15.1 | 15.2                          | 3.1  | 17.3         | 3.6  | [a1] |
| Basophils                                       | (10 <sup>3</sup> /μL) | 0.01                        | 0.01 | 0.01         | 0    | 0.01                          | 0.01 | 0.01         | 0.01 | [a2] |
|                                                 | (%)                   | 0.3                         | 0.2  | 0.3          | 0.1  | 0.5                           | 0.2  | 0.3          | 0.2  | [a3] |
| Eosinophils                                     | (10 <sup>3</sup> /μL) | 0.13                        | 0.04 | 0.11         | 0.08 | 0.16                          | 0.17 | 0.14         | 0.08 | [a]  |
|                                                 | (%)                   | 5                           | 1.8  | 3.4          | 1.7  | 4.9                           | 3.1  | 4.4          | 1.7  | [a]  |
| Lymphocytes                                     | (10 <sup>3</sup> /μL) | 2.29                        | 1.07 | 2.19         | 1.37 | 2.11                          | 0.96 | 2.74         | 1.36 | [a]  |
|                                                 | (%)                   | 74.6                        | 5.6  | 69.2         | 13.9 | 77.4                          | 2.6  | 75.6         | 4.6  | [a]  |
| Monocytes                                       | (10 <sup>3</sup> /μL) | 0.04                        | 0.02 | 0.04         | 0.04 | 0.03                          | 0.02 | 0.04         | 0.03 | [a]  |
|                                                 | (%)                   | 1.2                         | 0.3  | 0.9          | 0.7  | 1                             | 0.4  | 1.3          | 0.3  | [a]  |
| <b>Erythrocyte Count (RBC)</b>                  | (10 <sup>6</sup> /μL) | 9.26                        | 0.32 | 9.36         | 0.46 | 8.96                          | 0.47 | 9.43         | 0.33 | [a1] |
| Reticulocytes                                   | (10 <sup>9</sup> /L)  | 299.5                       | 34.9 | 369          | 90.1 | 297.6                         | 45   | 399.2*       | 52.6 | [a2] |
|                                                 | (%)                   | 3.23                        | 0.32 | 3.94         | 0.97 | 3.33                          | 0.56 | 4.23*        | 0.49 | [a1] |
| <b>RBC Distribution Width (RDW)</b>             | (%)                   | 13.1                        | 0.7  | 15.2*        | 1    | 12.8                          | 0.4  | 14.4*        | 0.6  | [a1] |
| <b>Hemoglobin (HGB)</b>                         | (g/dL)                | 14.8                        | 0.6  | 14.3         | 0.9  | 14.7                          | 0.7  | 14.7         | 0.6  | [a1] |
| <b>Hematocrit (HCT)</b>                         | (%)                   | 47.6                        | 1.8  | 46           | 2    | 46.7                          | 2.7  | 46.5         | 1.8  | [a1] |
| <b>Mean Corpuscular Volume (MCV)</b>            | (fL)                  | 51.5                        | 1.5  | 49.2*        | 1.2  | 52.2                          | 2.2  | 49.4*        | 2.1  | [a]  |
| <b>Mean Corpuscular Hemoglobin (MCH)</b>        | (pg)                  | 16                          | 0.5  | 15.3*        | 0.4  | 16.4                          | 0.6  | 15.6*        | 0.7  | [a]  |
| <b>Mean Corpuscular Hemoglobin Conc. (MCHC)</b> | (g/dL)                | 31.1                        | 0.6  | 31.2         | 0.6  | 31.4                          | 0.7  | 31.5         | 0.5  | [a]  |
| <b>Platelet Count (PLT)</b>                     | (10 <sup>3</sup> /μL) | 1303                        | 139  | 1204         | 149  | 1122                          | 94   | 1081         | 173  | [a1] |
| <b>Mean Platelet Volume (MPV)</b>               | (fL)                  | 7.2                         | 0.7  | 7.6          | 0.6  | 6.8                           | 0.5  | 7.7*         | 0.6  | [a2] |

\* Denotes statistically significant difference from concurrent vehicle controls p ≤ 0.05 using the following statistical tests as indicated

a - Anova & Dunnett

a1 - Anova & Dunnett (log)

a2 - Kruskal-Wallis & Dunnett on Ranks

a3 - Kruskal-Wallis
