# Supplementary material for: MRTX1719 Is an MTA-Cooperative PRMT5 Inhibitor That Exhibits Synthetic Lethality in Preclinical Models and Patients with MTAP-Deleted Cancer
Source: PubMed Central journal article supplement — Cancer Discov. 2023 Aug 8;13(11):2412–31. doi: 10.1158/2159-8290.CD-23-0669 (PMC10618744; doi:10.1158/2159-8290.cd-23-0669), 2023-08-08
Supplement: cd-23-0669_supplementary_table_s4_suppst4.pdf [file cd-23-0669_supplementary_table_s4_suppst4.pdf]

Table S4. Treatment-Related Treatment-Emergent Adverse Events by Preferred Term and Maximum Grade Safety Population

| Preferred Term<br>Toxicity Grade                                                                 | Initial Dose Level |               |               |               |               |
|--------------------------------------------------------------------------------------------------|--------------------|---------------|---------------|---------------|---------------|
|                                                                                                  | 50 mg QD (%)       | 100 mg QD (%) | 200 mg QD (%) | 400 mg QD (%) | 800 mg QD (%) |
| Anaemia                                                                                          |                    |               |               |               |               |
| Grade 1                                                                                          | 0                  | 0             | 16.7          | 0             | 20.0          |
| Grade 2                                                                                          | 0                  | 0             | 0             | 0             | 0             |
| Grade 3                                                                                          | 0                  | 0             | 0             | 0             | 0             |
| Grade 4                                                                                          | 0                  | 0             | 0             | 0             | 0             |
| Grade 5                                                                                          | 0                  | 0             | 0             | 0             | 0             |
| Neutropenia                                                                                      |                    |               |               |               |               |
| Grade 1                                                                                          | 0                  | 16.7          | 0             | 0             | 20.0          |
| Grade 2                                                                                          | 0                  | 0             | 0             | 0             | 0             |
| Grade 3                                                                                          | 0                  | 0             | 0             | 0             | 0             |
| Grade 4                                                                                          | 0                  | 0             | 0             | 0             | 0             |
| Grade 5                                                                                          | 0                  | 0             | 0             | 0             | 0             |
| Thrombocytopenia*                                                                                |                    |               |               |               |               |
| Grade 1                                                                                          | 0                  | 0             | 16.7          | 0             | 0             |
| Grade 2                                                                                          | 25.0               | 0             | 0             | 0             | 0             |
| Grade 3                                                                                          | 0                  | 0             | 0             | 0             | 0             |
| Grade 4                                                                                          | 0                  | 0             | 0             | 0             | 0             |
| Grade 5                                                                                          | 0                  | 0             | 0             | 0             | 0             |
| *Includes Platelet Count Decreased<br>Data Cut-off Date: 27June2023; Source: IDMC Table 14.3.2.6 |                    |               |               |               |               |
